# Supplementary material for: Comparative Transcriptome-Based Mining of Genes Involved in the Export of Polyether Antibiotics for Titer Improvement
Source: MDPI journal article supplement (doi:10.3390/antibiotics11050600), 2022-04-29
Supplement: s1 [file s1]

Supplementary Material

## **Comparative transcriptome-based mining of genes involved in the export of polyether antibiotics for titer improvement**

Xian Liu<sup>1,2</sup>, Yuanting Wu<sup>1,2</sup>, Xiaojie Zhang<sup>1,2</sup>, Qianjin Kang<sup>1,2</sup>, Yu-Si Yan<sup>1,3,\*</sup>, Linqun Bai<sup>1,2,\*</sup>

<sup>1</sup> State Key Laboratory of Microbial Metabolism, Shanghai-Islamabad-Belgrade Joint Innovation Center on Antibacterial Resistances, School of Life Sciences & Biotechnology, Shanghai Jiao Tong University, Shanghai 200240, China

<sup>2</sup> Joint International Research Laboratory of Metabolic & Developmental Sciences, Shanghai Jiao Tong University, Shanghai 200240, China.

<sup>3</sup> Institute of Biopharmaceuticals, Taizhou University, Taizhou 318000, China

**Table S1.** Strains and plasmids used in this study.

| Strains or plasmids       | Features                        | Sources    |
|---------------------------|---------------------------------|------------|
| <i>Streptomyces albus</i> |                                 |            |
| BK3-25                    | Salinomycin high-yield producer | [1]        |
| LX01                      | BK3-25 $\Delta$ SLNHY_0929      | This study |
| LX02                      | BK3-25 $\Delta$ SLNHY_1893      | This study |
| LX03                      | BK3-25 $\Delta$ SLNHY_3363      | This study |
| LX04                      | BK3-25 $\Delta$ SLNHY_4037      | This study |
| LX05                      | BK3-25 $\Delta$ SLNHY_0199      | This study |
| LX06                      | BK3-25 $\Delta$ SLNHY_0818      | This study |
| LX07                      | BK3-25 $\Delta$ SLNHY_6316      | This study |
| LX08                      | BK3-25 $\Delta$ SLNHY_6652      | This study |
| LX09                      | BK3-25:: <i>SLNHY_0929</i>      | This study |
| LX-10                     | BK3-25:: <i>SLNHY_1893</i>      | This study |
| LX-11                     | BK3-25:: <i>SLNHY_3363</i>      | This study |
| LX-12                     | BK3-25:: <i>SLNHY_4037</i>      | This study |
| LX-13                     | BK3-25:: <i>SLNHY_0199</i>      | This study |
| LX-14                     | BK3-25:: <i>SLNHY_0818</i>      | This study |
| LX-15                     | BK3-25:: <i>SLNHY_6316</i>      | This study |
| LX-16                     | BK3-25:: <i>SLNHY_6652</i>      | This study |
| LX-17                     | LX01:: <i>SLNHY_0929</i>        | This study |
| LX-18                     | LX02:: <i>SLNHY_1893</i>        | This study |

---

|                                   |                          |            |
|-----------------------------------|--------------------------|------------|
| LX-19                             | LX03:: <i>SLNHY_3363</i> | This study |
| LX-20                             | LX04:: <i>SLNHY_4037</i> | This study |
| LX-21                             | LX05:: <i>SLNHY_0199</i> | This study |
| LX-22                             | LX06:: <i>SLNHY_0818</i> | This study |
| LX-23                             | LX07:: <i>SLNHY_6316</i> | This study |
| LX-24                             | LX08:: <i>SLNHY_6652</i> | This study |
| LX-25                             | BK3-25::pIB139           | This study |
| <i>Streptomyces lividans</i>      |                          |            |
| TK24                              |                          | [2]        |
| LX-26                             | TK24::pIB139             | This study |
| LX-27                             | TK24:: <i>LNHY_0929</i>  | This study |
| LX-28                             | TK24:: <i>SLNHY_1893</i> | This study |
| LX-29                             | TK24:: <i>SLNHY_3363</i> | This study |
| LX-30                             | TK24:: <i>SLNHY_4037</i> | This study |
| LX-31                             | TK24:: <i>SLNHY_0199</i> | This study |
| LX-32                             | TK24:: <i>SLNHY_0818</i> | This study |
| LX-33                             | TK24:: <i>SLNHY_6316</i> | This study |
| LX-34                             | TK24:: <i>SLNHY_6652</i> | This study |
| <i>Streptomyces cinnamonensis</i> |                          |            |
| ATCC 15413                        |                          | [3]        |

---

---

|                                       |                                         |            |
|---------------------------------------|-----------------------------------------|------------|
| LX-35                                 | ATCC 15413::pLQ648                      | This study |
| LX-36                                 | ATCC 15413:: <i>SLNHY_0929</i>          | This study |
| LX-37                                 | ATCC 15413:: <i>SLNHY_1893</i>          | This study |
| LX-38                                 | ATCC 15413:: <i>SLNHY_3363</i>          | This study |
| LX-39                                 | ATCC 15413:: <i>SLNHY_4037</i>          | This study |
| <br><i>Streptomyces lasaliensis</i>   |                                         |            |
| ATCC 31180                            |                                         | [4]        |
| LX-40                                 | ATCC 31180::pLQ648                      | This study |
| LX-41                                 | ATCC 31180:: <i>SLNHY_0929</i>          | This study |
| LX-42                                 | ATCC 31180:: <i>SLNHY_1893</i>          | This study |
| LX-43                                 | ATCC 31180:: <i>SLNHY_3363</i>          | This study |
| LX-44                                 | ATCC 31180:: <i>SLNHY_4037</i>          | This study |
| <br><i>Streptomyces hygroscopicus</i> |                                         |            |
| XM201- <i>ga32</i>                    | XM201 with geldanamycin BGC deleted     | [5]        |
| LX-45                                 | XM201- <i>ga32</i> ::pLQ648             | This study |
| LX-46                                 | XM201- <i>ga32</i> :: <i>SLNHY_0929</i> | This study |
| LX-47                                 | XM201- <i>ga32</i> :: <i>SLNHY_1893</i> | This study |
| LX-48                                 | XM201- <i>ga32</i> :: <i>SLNHY_3363</i> | This study |
| LX-49                                 | XM201- <i>ga32</i> :: <i>SLNHY_4037</i> | This study |

---

---

***E. coli***

|                  |                                                                                                                                                                                                                                                                                   |           |
|------------------|-----------------------------------------------------------------------------------------------------------------------------------------------------------------------------------------------------------------------------------------------------------------------------------|-----------|
| DH10B            | F' ( <i>tra</i> $\Delta$ 36 <i>proAB lacIq lacZ</i> $\Delta$ M15) <i>rpsL</i><br><br>( <i>strR</i> ) <i>thr leu endA thi-1 lacY galK galT ara</i><br><br><i>tonA tsx dam dcm supE44</i> $\Delta$ ( <i>lac-proAB</i> )<br><br>$\Delta$ ( <i>mcrCmrr</i> )102::Tn10 ( <i>tetR</i> ) | GIBCO-BRL |
| ET12567(pUZ8002) | <i>RecE dam dcm hsdS Cm Str Tet Km</i>                                                                                                                                                                                                                                            | [6]       |

**Plasmids**

|                    |                                                                              |            |
|--------------------|------------------------------------------------------------------------------|------------|
| pBluescript II SK+ | <i>bla lacZ orifI</i>                                                        | Stratagene |
| pIB139             | $\Phi$ C3I <i>int aac(3)IV lacZa ori</i> <sub>TRK2</sub> <i>ermE</i> *p      | [7]        |
| pLQ646             | $\Phi$ C3I <i>int aac(3)IV lacZa ori</i> <sub>TRK2</sub> <i>kasO</i> p*      | [8]        |
| pJTU1278           | <i>pIJ101-rep tsr oriT</i>                                                   | [9]        |
| pLQ1250            | Insertion of <i>SLNHY_0929</i> downstream of<br><br><i>ermE</i> *p in pIB139 | This study |
| pLQ1251            | Insertion of <i>SLNHY_1893</i> downstream of<br><br><i>ermE</i> *p in pIB139 | This study |
| pLQ1252            | Insertion of <i>SLNHY_3363</i> downstream of<br><br><i>ermE</i> *p in pIB139 | This study |
| pLQ1253            | Insertion of <i>SLNHY_4037</i> downstream of<br><br><i>ermE</i> *p in pIB139 | This study |
| pLQ1254            | Insertion of <i>SLNHY_0199</i> downstream of<br><br><i>ermE</i> *p in pIB139 | This study |

---

---

|         |                                                                                      |            |
|---------|--------------------------------------------------------------------------------------|------------|
| pLQ1255 | Insertion of <i>SLNHY_0818</i> downstream of <i>ermE</i> *p in pIB139                | This study |
| pLQ1256 | Insertion of <i>SLNHY_6316</i> downstream of <i>ermE</i> *p in pIB139                | This study |
| pLQ1257 | Insertion of <i>SLNHY_6652</i> downstream of <i>ermE</i> *p in pIB139                | This study |
| pLQ1258 | Insertion of <i>SLNHY_0929</i> downstream of <i>kasOp</i> * in pLQ646                | This study |
| pLQ1260 | Insertion of <i>SLNHY_3363</i> downstream of <i>kasOp</i> * in pLQ646                | This study |
| pLQ1261 | Insertion of <i>SLNHY_4037</i> downstream of <i>kasOp</i> * in pLQ646                | This study |
| pLQ1266 | Insertion of 1233 bp left arm and 1184 bp right arm of <i>SLNHY_0929</i> in pJTU1278 | This study |
| pLQ1267 | Insertion of 1191 bp left arm and 1000 bp right arm of <i>SLNHY_1893</i> in pJTU1278 | This study |
| pLQ1268 | Insertion of 1138 bp left arm and 1070 bp right arm of <i>SLNHY_3363</i> in pJTU1278 | This study |
| pLQ1269 | Insertion of 1155 bp left arm and 1068 bp right arm of <i>SLNHY_4037</i> in pJTU1278 | This study |
| pLQ1270 | Insertion of 1252 bp left arm and 1253 bp right arm of <i>SLNHY_0199</i> in pJTU1278 | This study |

---

---

|         |                                                                                         |            |
|---------|-----------------------------------------------------------------------------------------|------------|
| pLQ1271 | Insertion of 1248 bp left arm and 1211 bp<br>right arm of <i>SLNHY_0818</i> in pJTU1278 | This study |
| pLQ1272 | Insertion of 1109 bp left arm and 1131 bp<br>right arm of <i>SLNHY_6316</i> in pJTU1278 | This study |
| pLQ1273 | Insertion of 1172 bp left arm and 1091 bp<br>right arm of <i>SLNHY_6652</i> in pJTU1278 | This study |

---

**Table S2.** Primers used in this study.

| Primer                         | Sequence (5'-3')                |
|--------------------------------|---------------------------------|
| SLNHY_0929-LF- <i>Xba</i> I    | TATATCTAGAGTAGGCGGCGTTGTTGAAG   |
| SLNHY_0929-LR- <i>Hind</i> III | TATAAAGCTTTGAACAGCGTGCGGAAGT    |
| SLNHY_0929-RF- <i>Hind</i> III | TATAAAGCTTCCGAACAACAGGAGGAGGTC  |
| SLNHY_0929-RR- <i>Kpn</i> I    | TATAGGTACCTGGTGAGCGAGCCGAAGTA   |
| SLNHY_0929-YZ-F                | CAGAGCAATGTGAAGGTGTGA           |
| SLNHY_0929-YZ-R                | TCCTGTGGAGTCTTGAACGA            |
| SLNHY_1893-LF- <i>Xba</i> I    | TATATCTAGACGAGGAAGAGGCGAAGGAT   |
| SLNHY_1893-LR- <i>Hind</i> III | TATAAAGCTTACAGCAGATGGTGGTAGGC   |
| SLNHY_1893-RF- <i>Hind</i> III | TATAAAGCTTTCGTTGGAAGAGGCGTTCA   |
| SLNHY_1893-RR- <i>Kpn</i> I    | TATAGGTACCCACCCACAGGCACATGATC   |
| SLNHY_1893-YZ-F                | ACTACGACCGCCTCAAGGA             |
| SLNHY_1893-YZ-R                | TCGCCGTACTCGTG GTTGA            |
| SLNHY_4037-LF- <i>Xba</i> I    | TATATCTAGATCGCCAAGAACATCGTCCTC  |
| SLNHY_4037-LR- <i>Eco</i> RI   | TATAGAATTCCGCTCATCGCCTTCGTCAT   |
| SLNHY_4037-RF- <i>Eco</i> RI   | TATAGAATTCCAGGACGAAGGTGACCCAGA  |
| SLNHY_4037-RR- <i>Hind</i> III | TATAAAGCTTCGAAGAACGACGGCAACTT   |
| SLNHY_4037-YZ-F                | GATCTCGCTCAGCTCGTTCT            |
| SLNHY_4037-YZ-R                | CCTCGTGCTCTTCGTCATCA            |
| SLNHY_3363-LF- <i>Xba</i> I    | TATATCTAGAGACGATATTGGAGACCATGCC |
| SLNHY_3363-LR- <i>Eco</i> RI   | TATAGAATTCTGCTGACCGCCATCAAGTA   |



---

|                               |                                               |
|-------------------------------|-----------------------------------------------|
| SLNHY_3363-RF- <i>EcoRI</i>   | TATAGA <u>AATT</u> CCGCTCCTTGAACCAGTCCA       |
| SLNHY_3363-RR- <i>HindIII</i> | TATAA <u>AGCTT</u> TACCACGGCAACACCAACTA       |
| SLNHY_3363-YZ-F               | AGGACGAAGGAGATGTGGAAG                         |
| SLNHY_3363-YZ-R               | GTCACCGTGGAGCACAAGTA                          |
| SLNHY_0199-LF- <i>XbaI</i>    | TATAT <u>CTAG</u> ATTCTCCGGTGGCGAGTTGGG       |
| SLNHY_0199-LR- <i>EcoRI</i>   | TATAGA <u>AATT</u> CCCGCCGCAAGGAGGTGTCCCTGTGA |
| SLNHY_0199-RF- <i>EcoRI</i>   | TATAGA <u>AATT</u> CCCCAGGAAACCGATGGCGAAAA    |
| SLNHY_0199-RR- <i>HindIII</i> | TATAA <u>AGCTT</u> CGGGGAAGACTGGTGGTGGATT     |
| SLNHY_0199-YZ-F               | GGCCAGGTCGTCGCCCATCT                          |
| SLNHY_0199-YZ-R               | GTGACCATTCGGTTTCTGTTTCC                       |
| SLNHY_0818-LF- <i>XbaI</i>    | TATAT <u>CTAG</u> AGGTGATGGCGACGATGTCCT       |
| SLNHY_0818-LR- <i>EcoRI</i>   | TATAGA <u>AATT</u> CTCCCGCCGCACGCAGAAGA       |
| SLNHY_0818-RF- <i>EcoRI</i>   | TATAGA <u>AATT</u> CTGCGCGGAGTTCTTGCGGAG      |
| SLNHY_0818-RR- <i>HindIII</i> | TATAA <u>AGCTT</u> CACCGCGGAGATCGCGGTGC       |
| SLNHY_0818-YZ-F               | CTTGCGGCGGCGATGTTGT                           |
| SLNHY_0818-YZ-R               | CGCAACAACGGTGTCTTCAGC                         |
| SLNHY_6316-LF- <i>XbaI</i>    | TATAT <u>CTAG</u> AGCGACCAGTTGCTCGGCGGC       |
| SLNHY_6316-LR- <i>EcoRI</i>   | TATAGA <u>AATT</u> CGGCTCCCCGGTCAACTCCTC      |
| SLNHY_6316-RF- <i>EcoRI</i>   | TATAGA <u>AATT</u> CCGGACAGGAACCGGCGGAAGAA    |
| SLNHY_6316-RR- <i>HindIII</i> | TATAA <u>AGCTT</u> ACGCGGACCCGGCGAACGCA       |
| SLNHY_6316-YZ-F               | TCAACCTTGCCGCCGACCTG                          |
| SLNHY_6316-YZ-R               | CATGCGTCCTGCCTCCTTGCT                         |

---

---

|                                |                                   |
|--------------------------------|-----------------------------------|
| SLNHY_6652-LF- <i>Xba</i> I    | TATATCTAGACCCGGTTCGAGGCGCAGGGTGAT |
| SLNHY_6652-LR- <i>Eco</i> RI   | TATAGAATTCCGAAGAACTGGAGGAACCC     |
| SLNHY_6652-RF- <i>Eco</i> RI   | TATAGAATTTCGAGGTCCCATGACTCGGAGAAG |
| SLNHY_6652-RR- <i>Hind</i> III | TATAAAGCTTCGATGGCGGAAGAAGCGATGAC  |
| SLNHY_6652-YZ-F                | CGTCCGCAGCCACATGGTGT              |
| SLNHY_6652-YZ-R                | ATCGTCGCACCACCCTCCTG              |
| SLNHY_0929-F- <i>Xba</i> I     | TATATCTAGAATGCAGACCAACTCCCCCTG    |
| SLNHY_0929-R- <i>Not</i> I     | TATAGCGGCCGCTCAGGAATCGGCGGGTGCGG  |
| SLNHY_1893-F- <i>Xba</i> I     | TATATCTAGAATGATCGAGCTCGAAGGGCT    |
| SLNHY_1893-R- <i>Not</i> I     | TATAGCGGCCGCTCAGGCCCCCTTCCCGGGTC  |
| SLNHY_4037-F- <i>Xba</i> I     | TATATCTAGAATGAGCCACGCAGCCACCAC    |
| SLNHY_4037-R- <i>Not</i> I     | TATAGCGGCCGCTCAGCGACCGGACTGCGGGG  |
| SLNHY_3363-F- <i>Xba</i> I     | TATATCTAGAGTGGCCGTGACCGCCGCGCT    |
| SLNHY_3363-R- <i>Not</i> I     | TATAGCGGCCGCCTACTTGATGGCGGTCAGCA  |
| SLNHY_0199-F- <i>Xba</i> I     | TATATCTAGATCACAGGGACACCTCCTTGC    |
| SLNHY_0199-R- <i>Not</i> I     | TATAGCGGCCGCGTGGTTTTTCGCCATCGGTTT |
| SLNHY_0818-F- <i>Xba</i> I     | TATATCTAGATCAGGCGCGTCCCGCGGTCT    |
| SLNHY_0818-R- <i>Not</i> I     | TATAGCGGCCGCGCGATGAGCGACCTCGCCAA  |
| SLNHY_6316-F- <i>Xba</i> I     | TATATCTAGAGTGAGCGCGCCGACCGAGGA    |
| SLNHY_6316-R- <i>Not</i> I     | TATAGCGGCCGCTCAGCGCGGGACGGCCTTTC  |
| SLNHY_6652-F- <i>Xba</i> I     | TATATCTAGATCATGCGGGTTCCTCCAGTT    |
| SLNHY_6652-R- <i>Not</i> I     | TATAGCGGCCGCCCCCTTCCGTGCCGCCCGCG  |

---

---

|                             |                                          |
|-----------------------------|------------------------------------------|
| SLNHY_0929-F- <i>Nde</i> I  | TATAC <u>CATATG</u> ATGCAGACCAACTCCCCCTG |
| SLNHY_0929-R- <i>Eco</i> RI | TATAGA <u>AATTCT</u> CAGGAATCGGCGGGTGCGG |
| SLNHY_0929-over-YZ-R        | TCAGGAATCGGCGGGTGCGG                     |
| SLNHY_4037-F- <i>Nde</i> I  | TATAC <u>CATATG</u> ATGAGCCACGCAGCCACCAC |
| SLNHY_4037-R- <i>Eco</i> RI | TATAGA <u>AATTCT</u> CAGCGACCGGACTGCGGGG |
| SLNHY_4037-over-YZ-R        | TCAGCGACCGGACTGCGGGG                     |
| SLNHY_3363-F- <i>Nde</i> I  | TATAC <u>CATATG</u> GTGGCCGTGACCGCCGCGCT |
| SLNHY_3363-R- <i>Eco</i> RI | TATA <u>GAATTC</u> CTACTTGATGGCGGTCAGCA  |
| SLNHY_3363-over-YZ-R        | CTACTTGATGGCGGTCAGCA                     |
| pIB139-over-YZ-F            | CGAGTGTCCGTTTCGAGTGGCGG                  |
| pLQ646-over-YZ-F            | TTTGACAACATGCTGTGCGG                     |
| SLNHY_0929-RT-F             | GGACTCGCTCACCCTCGGACA                    |
| SLNHY_0929-RT-R             | CGTTGGCCTGCACCAGGCCT                     |
| SLNHY_1893-RT-F             | TATCCTGTGCGCGCCCCGG                      |
| SLNHY_1893-RT-R             | CCAGCCTTGGCCCCAGCCGG                     |
| SLNHY_3363-RT-F             | TGACCCAGACCAGCCGTC                       |
| SLNHY_3363-RT-R             | GGCGATCTTCTTCGAGGAGTT                    |
| SLNHY_4037-RT-F             | CCAGCATGACGCCCGTGGTG                     |
| SLNHY_4037-RT-R             | AGATGCTCAAGCTCGTCCCG                     |
| SLNHY_0199-RT-F             | GCAGATCAGGCCCGGCCAGC                     |
| SLNHY_0199-RT-R             | CGACTATCTGCGGTTCTGGATGG                  |
| SLNHY_0818-RT-F             | TAGCCGACGGCCTTGTCGGC                     |

---

---

|                 |                        |
|-----------------|------------------------|
| SLNHY_0818-RT-R | AGTTCGTCCGCAAGATCCGC   |
| SLNHY_6316-RT-F | CCTGGACGGCGTGAAGTTGGAC |
| SLNHY_6316-RT-R | GCCCAGCTCGTGGCTGATCC   |
| SLNHY_6652-RT-F | CGGAGGCCAGCTCGGTGGCG   |
| SLNHY_6652-RT-R | GGGTGCCTGCTCTTCCTCTTCG |
| hrdB-RT-F       | TGGTCGAGGTCATCAACA     |
| hrdB-RT-R       | GTCACCGAACTCACTGTC     |

---

**Table S3.** Transcription data and annotations of eight candidate genes.

| Gene              | Soybean oil supplementation |        |        | Annotation                                       |
|-------------------|-----------------------------|--------|--------|--------------------------------------------------|
|                   | 5%                          | 10%    | 15%    |                                                  |
| <i>SLNHY_0929</i> | 8.798                       | 9.275  | 9.297  | major facilitator transporter                    |
| <i>SLNHY_1893</i> | 9.026                       | 9.27   | 9.181  | nodulation ABC transporter NodI                  |
| <i>SLNHY_3363</i> | 8.851                       | 12.195 | 11.203 | ABC Fe <sup>3+</sup> transporter binding protein |
| <i>SLNHY_4037</i> | 10.539                      | 10.715 | 10.833 | phosphate ABC transporter permease               |
| <i>SLNHY_0199</i> | 7.499                       | 10.286 | 9.437  | iron ABC transporter                             |
| <i>SLNHY_0818</i> | 9.5                         | 9.499  | 9.838  | ABC transporter permease protein                 |
| <i>SLNHY_6316</i> | 9.993                       | 10.285 | 10.293 | ABC transporter-like protein                     |
| <i>SLNHY_6652</i> | 9.756                       | 9.946  | 10.056 | ABC transporter transmembrane subunit            |

**Table S4.** RT-qPCR results of candidate genes.

| Gene                                | <i>SLNHY</i><br>_0929 | <i>SLNHY</i><br>_1893 | <i>SLNHY</i><br>_3363 | <i>SLNHY</i><br>_4037 | <i>SLNHY</i><br>_0199 | <i>SLNHY</i><br>_0818 | <i>SLNHY</i><br>_6316 | <i>SLNHY</i><br>_6652 |
|-------------------------------------|-----------------------|-----------------------|-----------------------|-----------------------|-----------------------|-----------------------|-----------------------|-----------------------|
|                                     |                       |                       |                       |                       |                       |                       |                       |                       |
| Ct (5%)                             | 27.63                 | 26.65                 | 30.38                 | 25.36                 | 30.66                 | 26.43                 | 28.51                 | 30.22                 |
| Ct (15%)                            | 24.56                 | 24.23                 | 27.52                 | 23.99                 | 29.42                 | 25.52                 | 26.68                 | 28.45                 |
| - $\Delta$ Ct <sup>a</sup>          | 3.06                  | 2.42                  | 2.87                  | 1.37                  | 1.24                  | 0.90                  | 1.83                  | 1.78                  |
| 2 <sup>-<math>\Delta</math>Ct</sup> | 8.34                  | 5.35                  | 7.31                  | 2.58                  | 2.36                  | 1.87                  | 3.56                  | 3.43                  |

<sup>a</sup> - $\Delta$ Ct stands for the difference value between Cts under 5% and 15% soybean oil supplementation.

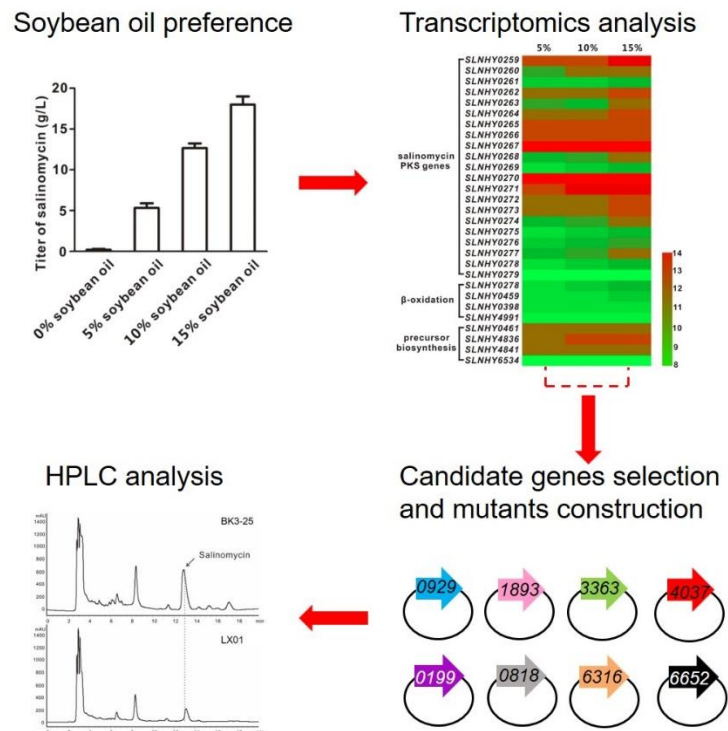

**Figure S2.** Flow chart of the strategy for exporter genes identification.

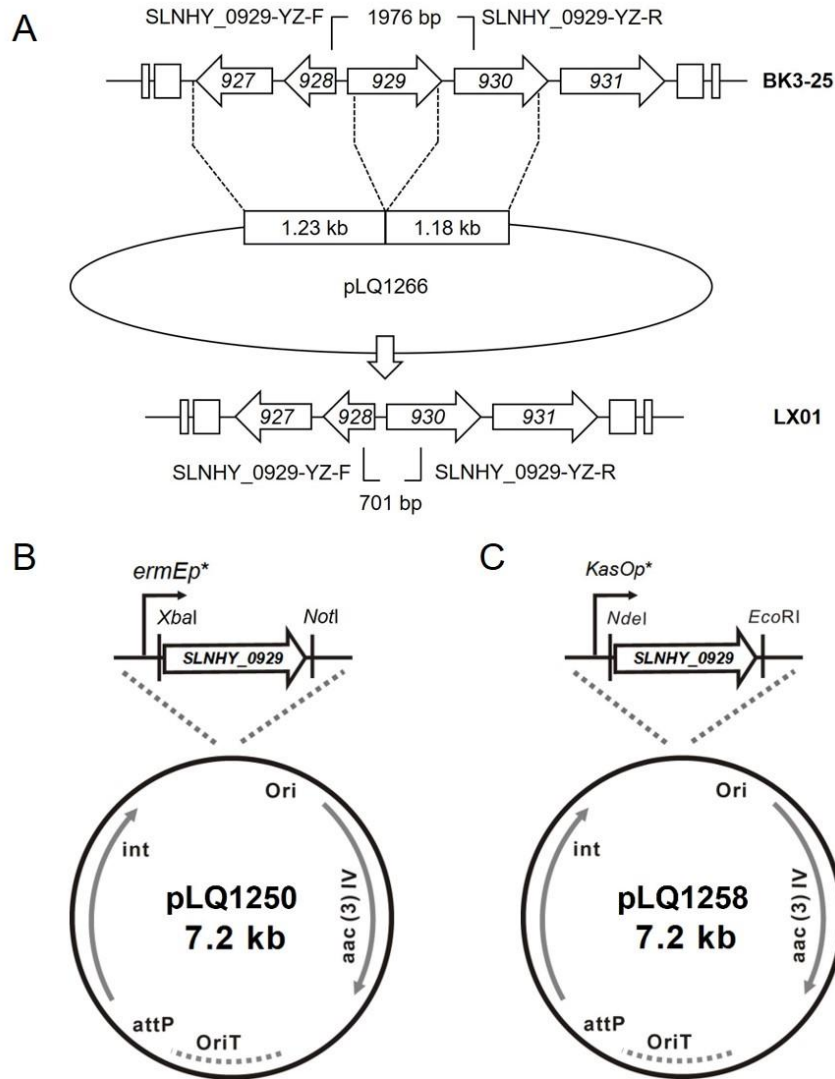

**Figure S2.** The process of gene deletion and over-expression of *SLNHY\_0929*. (A) pLQ1266 containing upstream and downstream of *SLNHY\_0929* was obtained. Through homologous recombination the gene was deleted, and the primers SLNHY\_0929-YZ-F/R were used to verify the double crossover mutant LX01. (B) pLQ1250, derived from pIJ139, was obtained by inserting *SLNHY\_0929* between *XbaI* and *NotI* digestion sites. (C) pLQ1258, derived from pLQ646, was obtained by inserting *SLNHY\_0929* between *NdeI* and *EcoRI* digestion sites.



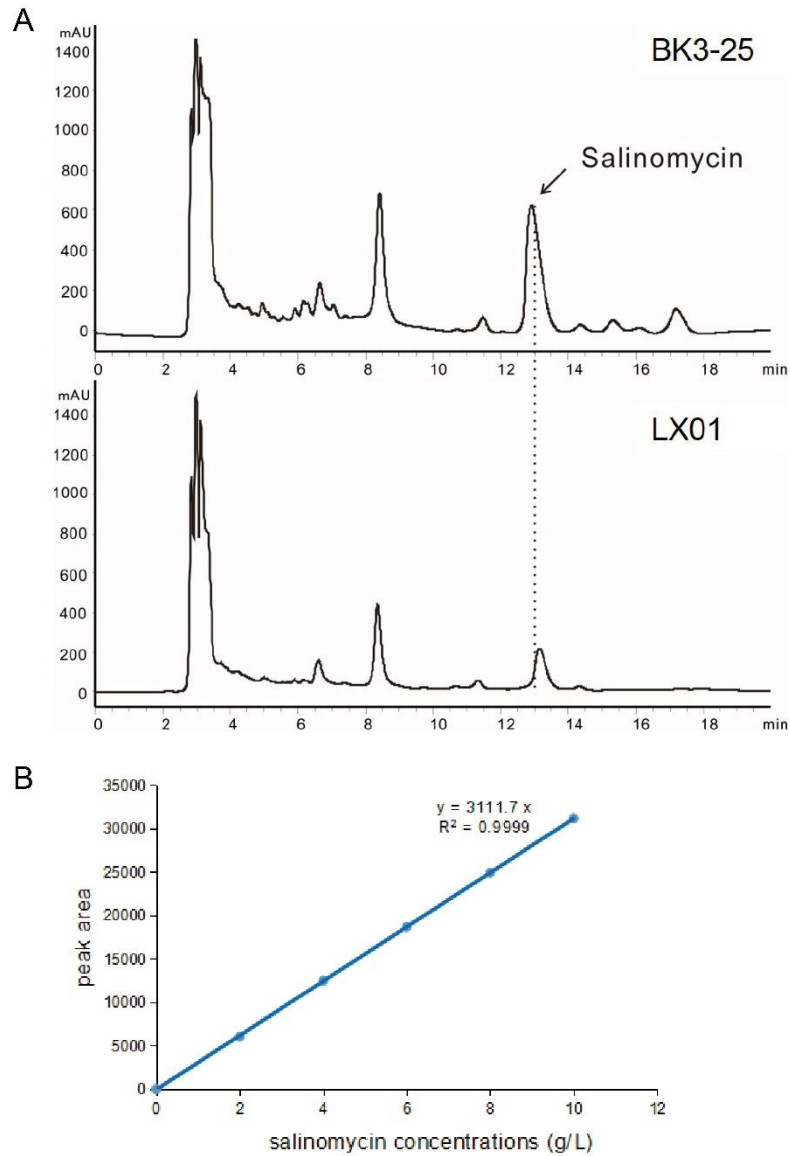

**Figure S3.** HPLC analysis of salinomycin in the fermentation culture of BK3-25 and its mutant LX01 with *SLNHY\_0929* deleted. (A) HPLC chromatograms of 10-fold diluted fermentation culture of BK3-25 and its mutant LX01 with *SLNHY\_0929* deleted. (B) The calibration curve of different concentrations of salinomycin standards. The detection UV wavelength is 210 nm.

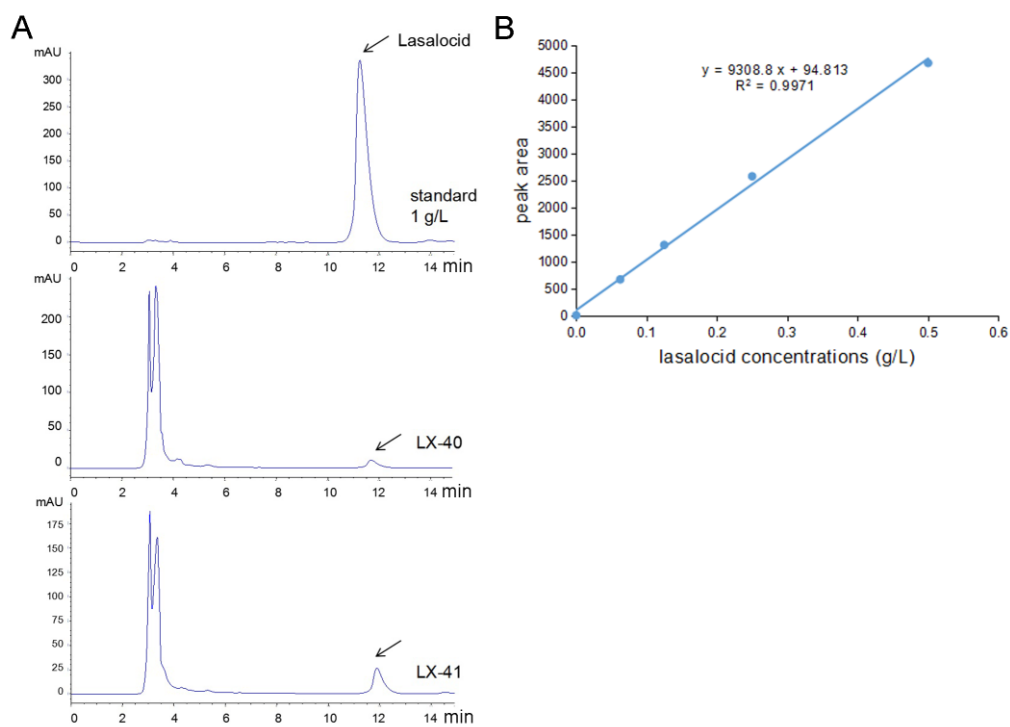

**Figure S4.** HPLC analysis of lasalocid in the fermentation culture of *S. lasaliensis* and its mutants. (A) HPLC analysis of lasalocid standard (1 g/L) and the 10-fold diluted fermentation culture of *S. lasaliensis* and its mutants. The detection UV wavelength is 305 nm. (B) The calibration curve of different concentrations of lasalocid standards.

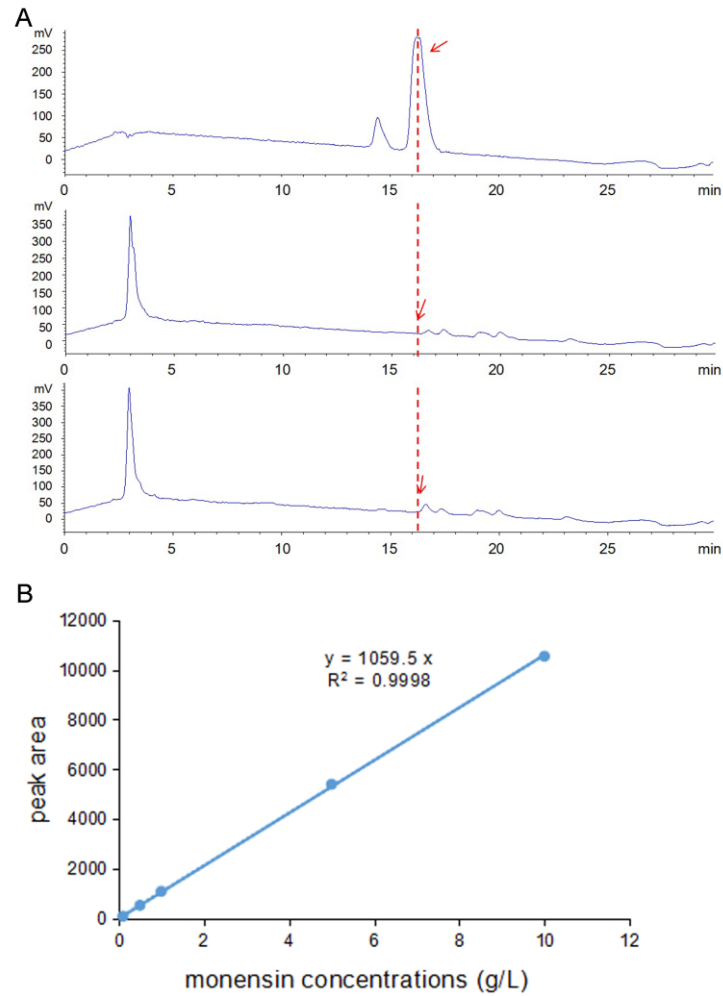

**Figure S5.** HPLC analysis of monensin in the fermentation culture of *S. cinnamonensis* and its mutants. (A) HPLC analysis of monensin standard (10 g/L) and the two-fold diluted fermentation culture of *S. cinnamonensis* and its mutants. (B) The calibration curve of different concentrations of monensin standards.

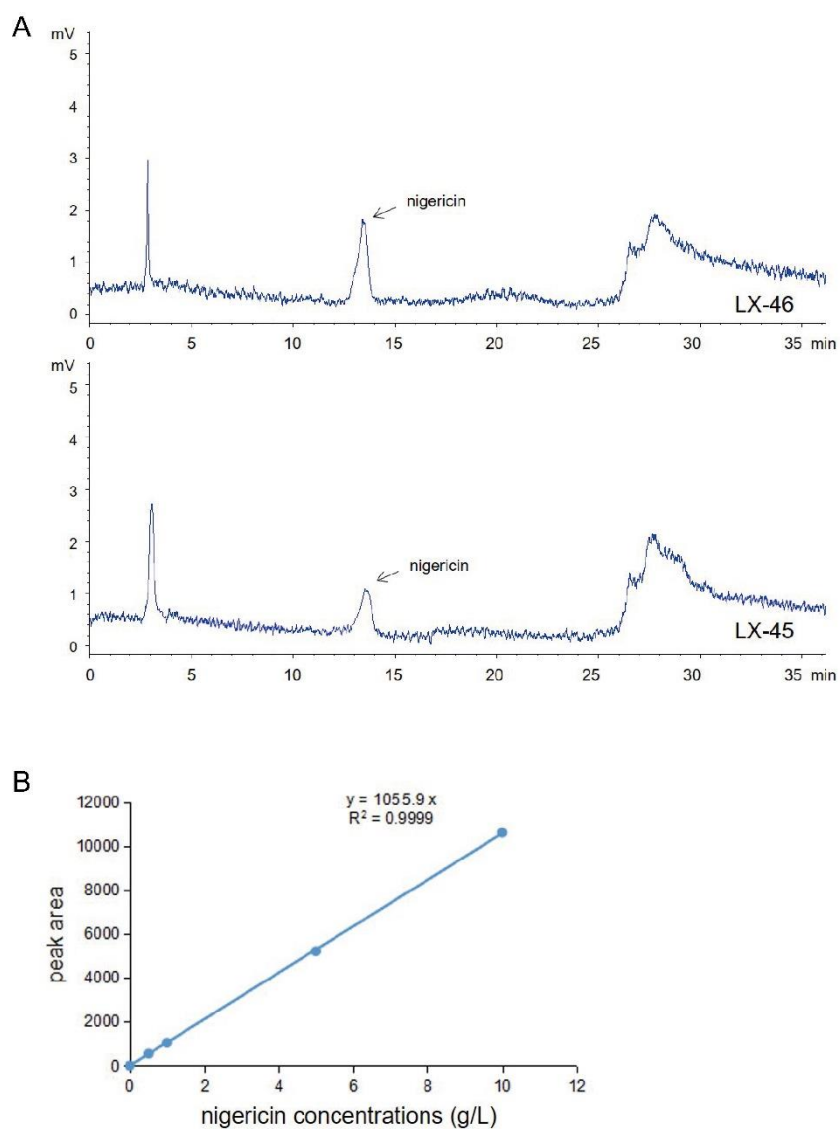

**Figure S6.** HPLC analysis of nigericin in the fermentation culture of *S. hygroscopicus* and its mutants. (A) HPLC analysis of two-fold diluted fermentation culture of *S. hygroscopicus* and its mutants. (B) The calibration curve of different concentrations of nigericin standards.

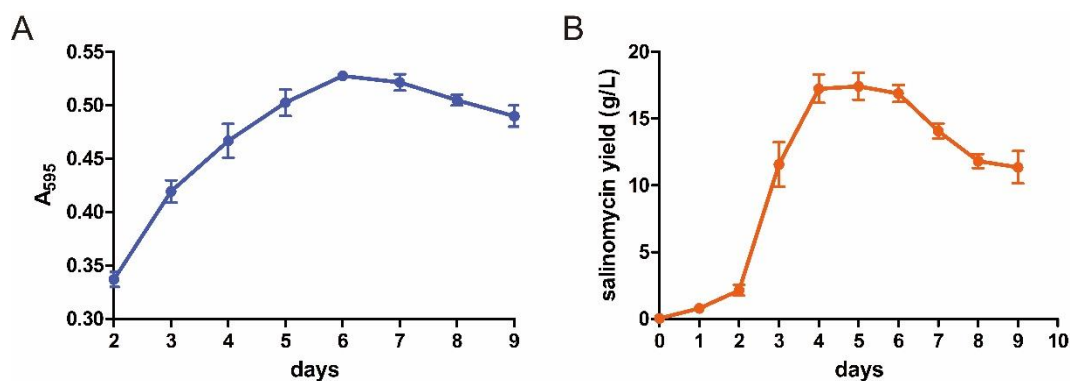

**Figure S7.** Growth (A) and salinomycin titer (B) curves of *Streptomyces albus* BK3-25. Due to the insoluble residues in the liquid medium, total intracellular nucleic acid was determined to represent the growth of *S. albus*. The concentration of intracellular nucleic acid was determined as described in Materials and methods. Mean values of three independent experiments with SD are indicated by error bars.

## Reference

1. Zhang, X.; Lu, C.; Bai, L. Mechanism of salinomycin overproduction in *Streptomyces albus* as revealed by comparative functional genomics. *Appl. Microbiol. Biot.* **2017**, *101*, 4635–4644,.
2. Hopwood, D.A.; Hintermann, G.; Kieser, T.; Wright, H.M. Integrated DNA sequences in three streptomycetes form related autonomous plasmids after transfer to *Streptomyces lividans*. *Plasmid*. **1984**, *11*, 1–16.
3. Day, L.E.; Chamberlin, J.W.; Gordee, E.Z.; Chen, S.; Gorman, M.; Hamill, R.L.; Ness, T.; Weeks, R.E.; Stroshane, R. Biosynthesis of monensin. *Antimicrob. Agents Chemother.* **1973**, *4*, 410–414.
4. Migita, A.; Watanabe, M.; Hirose, Y.; Watanabe, K.; Tokiwano, T.; Kinashi, H.;

- Oikawa, H. Identification of a gene cluster of polyether antibiotic lasalocid from *Streptomyces lasaliensis*. *Biosci. Biotechnol. Biochem.* **2009**, *73*, 169–176.
5. Wang, X.; Ning, X.; Zhao, Q.; Kang, Q.; Bai, L. Improved PKS gene expression with strong endogenous promoter resulted in geldanamycin yield increase. *J. Biotechnol.* **2017**, *12*, 1–8.
  6. Smith, P. High efficiency intergeneric conjugal transfer of plasmid DNA from *Escherichia coli* to methyl DNA-restricting streptomycetes. *FEMS. Microbiol. Lett.* **1997**, *155*, 223–229.
  7. Zhang, X.; Lu, C.; Bai, L. Conversion of the high-yield salinomycin producer *Streptomyces albus* BK3-25 into a surrogate host for polyketide production. *Sci. China Life Sci.* **2017**, *60*, 1000–1009.
  8. Wang, X.; Wang, R.; Kang, Q.; Bai, L. The antitumor agent ansamitocin P-3 binds to cell division protein FtsZ in *Actinosynnema pretiosum*. *Biomolecules.* **2020**, *10*, 699.
  9. Wang, Z.; Bai, L.; Liang, J.; Zhou, X.; Deng, Z. Two pHZ1358 derivative vectors for efficient gene knockout in *Streptomyces*. *J. Microbiol. Biotechnol.* **2010**, *20*, 678–682.
